# Supplementary material for: Analysis of Expression Pattern and Genetic Deletion of Netrin5 in the Developing Mouse
Source: PubMed Central journal article supplement (PMC4726805; doi:10.3389/fnmol.2016.00003), 2016-01-26
Supplement: Image_1.pdf [file Image_1.pdf]

*Supplementary Material*

**Analysis of Expression Pattern and Genetic Deletion of *Netrin5* in the Developing Mouse.**

**Andrew M. Garrett, Thomas J. Jucius, Liam P.R. Sigaud, Fu-Lei Tang, Wen-Cheng Xiong, Susan L. Ackerman, Robert W. Burgess\***

\* Correspondence: [Robert.Burgess@jax.org](mailto:Robert.Burgess@jax.org)



Netrin5 mouse - - - V R G R C Q C H G H A A R C A T R A Q - - - - - P P R C R  
 Netrin5 human - - - L R G R C Q C H G H A A R C A A R A R - - - - - P P R C H  
 Netrin1 mouse D L Q V G G R C K C N G H A A R C V R D R D D - - - - - S L V C D  
 Netrin3 mouse E L Q V G G R C K C N G H A S R C L L D T H G - - - - - H L V C D  
 Netrin4 mouse D F I V K G S C F C N G H A D Q C L P V E G F R P I K A P G A F H V V H G R C M

Netrin5 mouse C R H H T T G P G C E S C R P S H R D W P W R P A T P Q H - - P H P C L P C S C  
 Netrin5 human C R H H T T G P G C E S C R P S H R D W P W R P A T P R H - - P H P C L P C S C  
 Netrin1 mouse C R H N T A G P E C D R C K P F H Y D R P W Q R A T A R E - - A N E C V A C S C  
 Netrin3 mouse C Q H G T E G P D C S R C K P F Y C D R P W Q R A T G Q E - - A H A C L A C S C  
 Netrin4 mouse C K H N T A G S H C Q H C A P L Y N D R P W E A A D G R T G A P N E C R T C K C

Netrin5 mouse N Q H A R R C R F N S E L F R L S G G R S G G V C E R C R H H T A G R H C H Y C  
 Netrin5 human N Q H A R R C R F N S E L F R L S G G R S G G V C E R C R H H T A G R H C H Y C  
 Netrin1 mouse N L H A R R C R F N M E L Y K L S G R K S G G V C L N C R H N T A G R H C H Y C  
 Netrin3 mouse N G H A R R C R F N M E L Y R L S G R R S G G V C L N C R H N T A G R H C H Y C  
 Netrin4 mouse N G H A D T C H F D V N V W E A S G N R S G G V C N N C Q H N T E G Q H C Q R C

Netrin5 mouse Q P G F W R D P S Q P I T S H K A C R A C Q C H P I G - - - - - A T G G M C N  
 Netrin5 human Q P G F W R D P S Q P I F S R R A C R A C Q C H P I G - - - - - A T G G T C N  
 Netrin1 mouse K E G F Y R D M G K P I T H R K A C K A C D C H P V G - - - - - A A G K T C N  
 Netrin3 mouse R E G F Y R D P G R V L S D R R A C R A C D C H P V G - - - - - A A G K T C N  
 Netrin4 mouse K P G F Y R D L R R P F S A P D A C K A C S C H P V G S A I L P F S S V T F C D

Netrin5 mouse Q T S G Q C S C K L G V T G L T C N R C G P G Y Q - - - - -  
 Netrin5 human Q T S G Q C T C K L G V T G L T C N R C G P G Y Q - - - - -  
 Netrin1 mouse Q T T G Q C P C K D G V T G I T C N R C A K G Y Q - - - - -  
 Netrin3 mouse Q T T G Q C P C K D G V T G L T C N R C A P G F Q - - - - -  
 Netrin4 mouse P S N G D C P C K P G V A G P H C D R C M V G Y W G F G D Y G C R P C D C A G S

Netrin5 mouse - - - - - Q S R S P R M P C Q R I P E A T T T P A T T - P V A S R S D P  
 Netrin5 human - - - - - Q S R S P R M P C Q R I P E A T T T L A T T - P G A Y S S D P  
 Netrin1 mouse - - - - - Q S R S P I A P C I K I P V A P P T T A A S - S V E E - - P E  
 Netrin3 mouse - - - - - Q S R S P V A P C V K T P V P G P T E E S S - P V E - - P Q  
 Netrin4 mouse C D P L T G D C I S S N A D V D W Y H E V P A F H S M H N K S E P S W E W E D E

Netrin5 mouse Q C Q G Y C N V S - - - - - V S S V H M S L Q R Y C Q Q D Y V L H A Q V S A S S  
 Netrin5 human Q C Q N Y C N M S - - - - - D T R V H M S L R R Y C Q Q D H V L R A Q V L A S -  
 Netrin1 mouse D C D S Y C K A S - - - - - K G K L K M N M K K Y C R K D Y A V Q I H I - L K A  
 Netrin3 mouse D C E S H C R P A - - - - - R G S Y R I S L K K F C R K D Y A V Q V A V G A R G  
 Netrin4 mouse Q G F S A L R H S G K C E C K E Q V L G N P K A F C G M K Y S Y V L K I K I L S

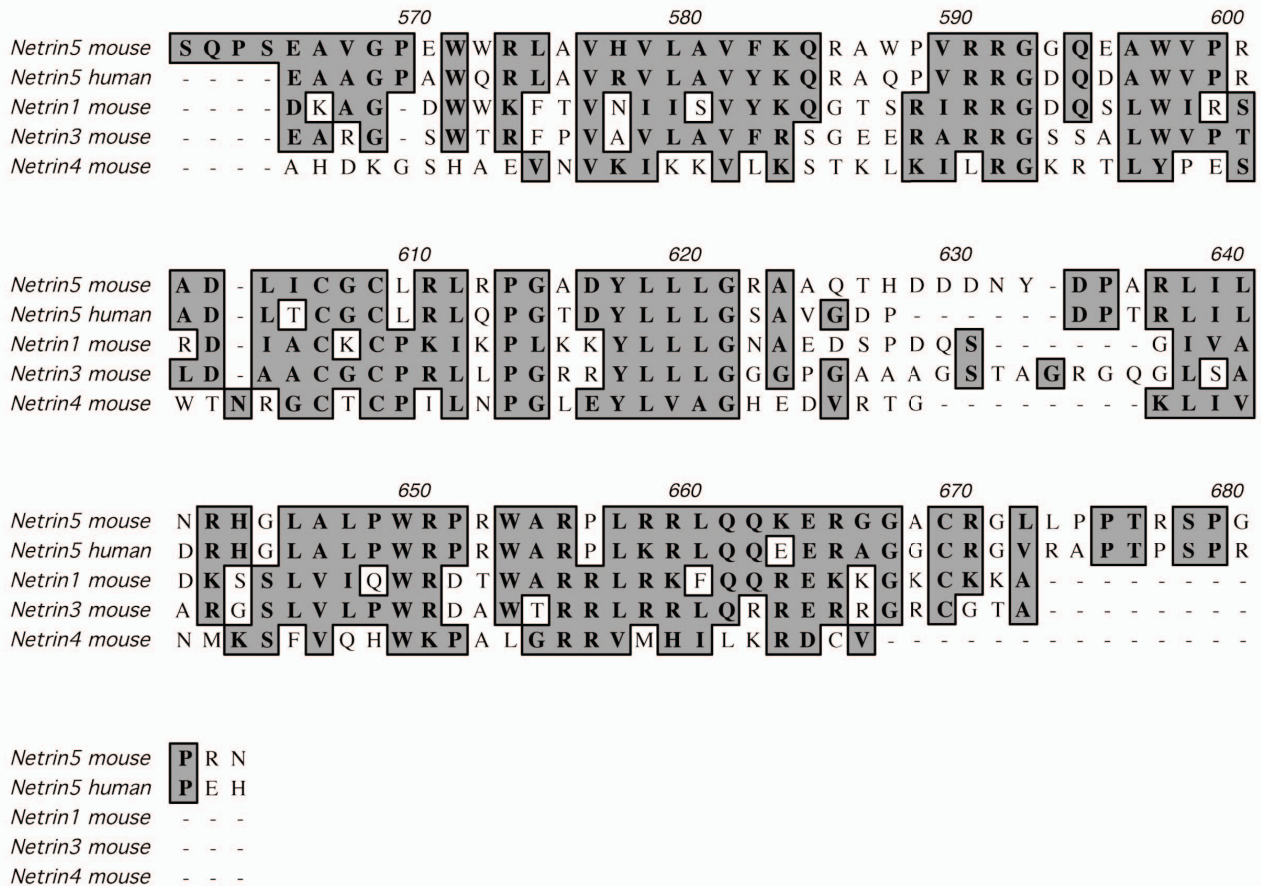**B**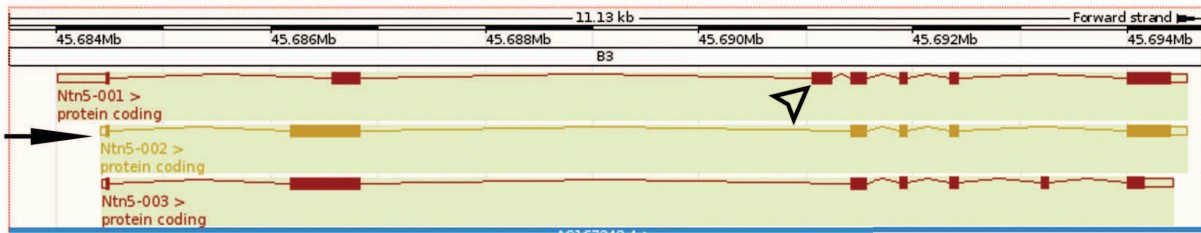

?

**Figure S1: Netrin5 is a classic Netrin.** Protein sequence alignment shows a high level of similarity between Netrin5 and other classic Netrins. Similar or identical residues are boxed. Sequence corresponding to the exon omitted in the short transcript is highlighted in blue (A). The gene structure of mouse *Ntn5* from the Ensembl genome browser (B). The *Ntn5-002* gene structure was experimentally validated. A second alternatively spliced isoform that also includes exon 3 of the *Ntn5-001* gene model introduced into the *Ntn5-002* transcript was also found. Other transcripts corresponding to gene prediction models may exist at low levels, but they were not found experimentally or in EST databases. NCBI gene and transcript models XM\_006540887.2, XP\_006540950.1 and XM\_006540890.2, XP\_006540953.1 do correctly predict the long and short *Ntn5* transcripts we identified, respectively.

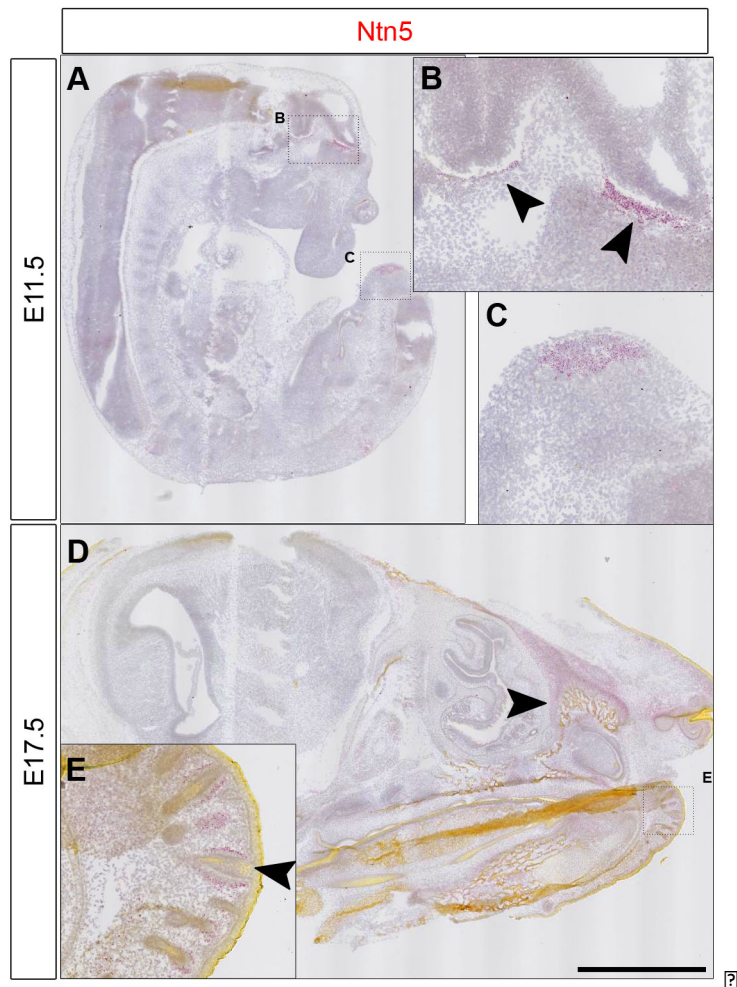

**Figure S2: Other *Ntn5* expression.** Netrin5 is expressed adjacent to the brain at E11.5 (**A,B**) and E17.5 (**D**). There was also expression associated with the olfactory system (**B,D** arrow), at the tail (**A,C**) and at the base of whiskers in the chin (**D,E**). Scale bar is 1.5 mm in **A,D** and 400 μm in **B,C,E**.

?

?

?

?

?

?

?

?

?

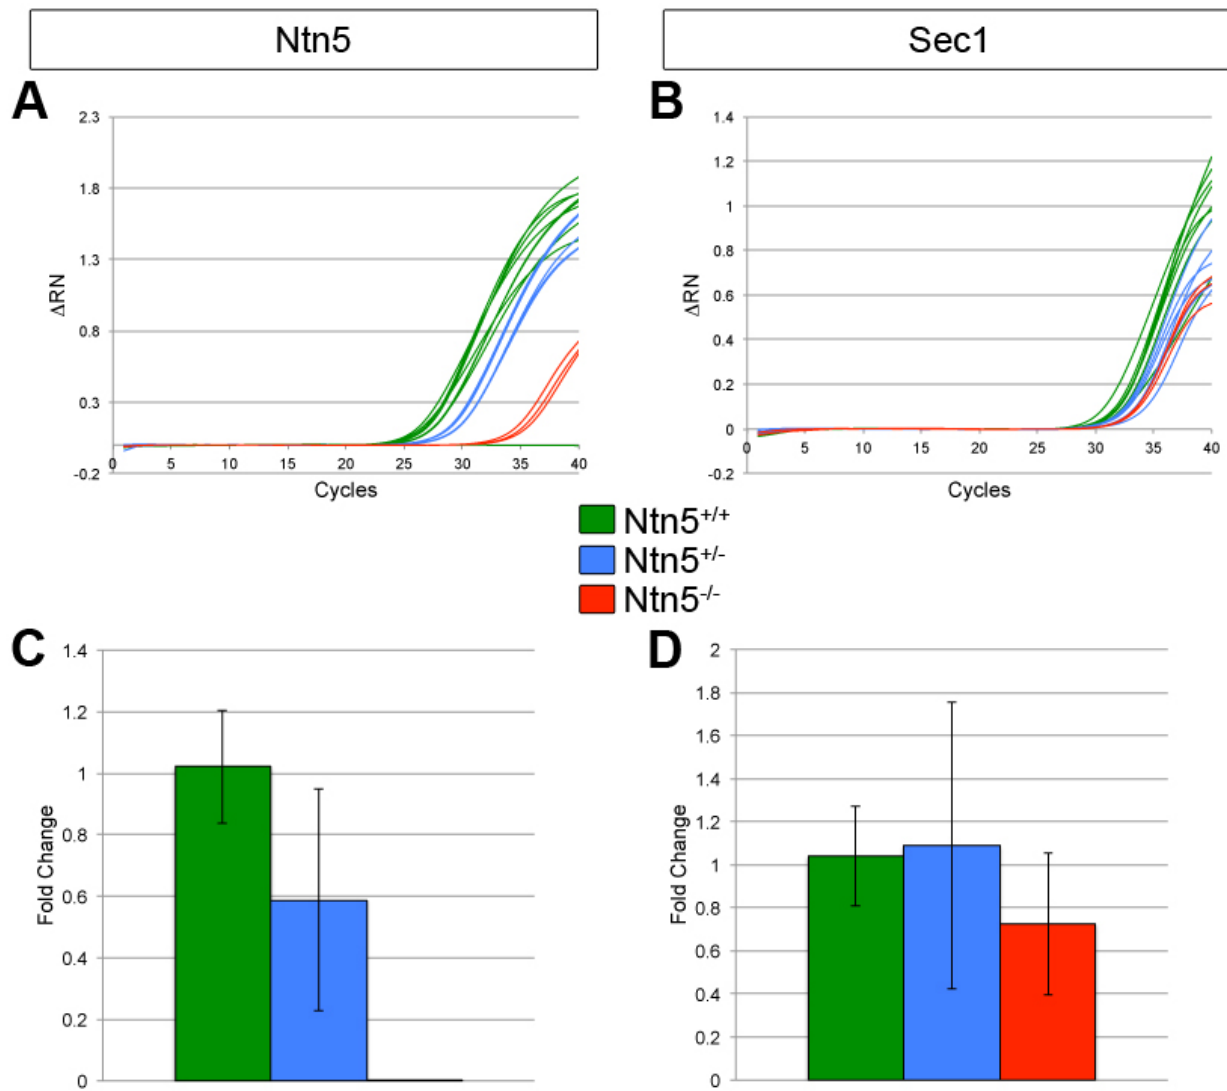

**Figure S3: *Ntn5* expression abolished without disrupting *Sec1* expression in  $Ntn5^{-/-}$  embryos.** QPCR analysis of *Ntn5* and *Sec1* transcripts from E13.5  $Ntn5^{+/+}$ ,  $Ntn5^{+/-}$ , and  $Ntn5^{-/-}$  whole embryos demonstrates that *Ntn5* transcripts were effectively removed in null mutants (**A,C**), while *Sec1* transcripts were not significantly reduced (**B,D**). Dissociation curves of the *Ntn5* products demonstrated that late-arising PCR products from  $Ntn5^{-/-}$  samples were different from the normal product in  $Ntn5^{+/+}$  and  $Ntn5^{+/-}$  samples. **A** and **B** show individual reactions from multiple embryos in triplicate, while fold change values in **C** and **D** are means  $\pm$  s.e.m. by genotype.
